# Supplementary material for: Efficient production of vindoline from tabersonine by metabolically engineered Saccharomyces cerevisiae
Source: PubMed Central journal article supplement (PMC8446080; doi:10.1038/s42003-021-02617-w), 2021-09-16
Supplement: 42003_2021_2617_MOESM1_ESM.pdf [file 42003_2021_2617_MOESM1_ESM.pdf]

## *Supplementary Material*

# 1 **Efficient Production of Vindoline from Tabersonine by Metabolically** 2 **Engineered *Saccharomyces cerevisiae***

3  
4 **Tengfei Liu<sup>1,2</sup>, Ying Huang<sup>3</sup>, Lihong Jiang<sup>1</sup>, Chang Dong<sup>1,2</sup>, Yuanwei Gou<sup>1</sup>, Jiazhang Lian<sup>1,2\*</sup>**

5 <sup>1</sup> Key Laboratory of Biomass Chemical Engineering of Ministry of Education, College of  
6 Chemical and Biological Engineering, Zhejiang University, Hangzhou, 310027, China

7 <sup>2</sup> Hangzhou Global Scientific and Technological Innovation Center, Zhejiang University,  
8 Hangzhou, 310027, China

9 <sup>3</sup> School of Chinese Materia Medica, Beijing University of Chinese Medicine, Beijing, 100102,  
10 China

### 11 **\*Correspondence**

12 Prof. Jiazhang Lian

13 Email: jzlian@zju.edu.cn

14 Key Laboratory of Biomass Chemical Engineering of Ministry of Education, College of Chemical  
15 and Biological Engineering, Zhejiang University, Hangzhou, 310027, China

16

17 **Supplementary Figures**

18

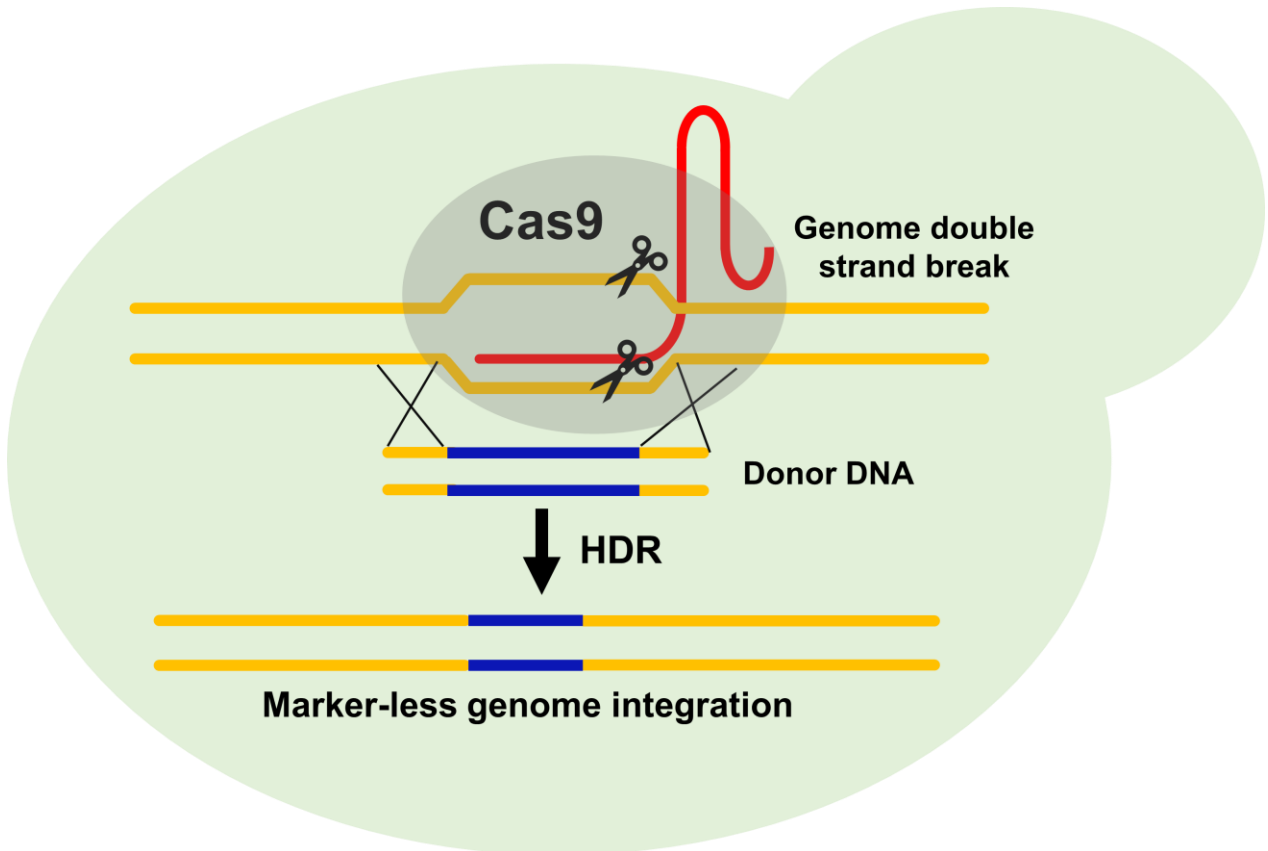

19

20 **Supplementary Fig. S1** A schematic overview of CRISPR/Cas9-mediated marker-less genome  
21 integration for the construction of the vindoline-producing yeast cell factories. The Cas9 nuclease  
22 was guided to a specific genomic locus by a sgRNA (shown in red) and led to the formation of a  
23 double strand break. The resultant genome double strand break was repaired via HDR. The donor  
24 DNA contained the heterologous gene expression cassettes (shown in blue) with 40 bp upstream  
25 and downstream homologous arms (shown in yellow) were integrated into the genome of *S.*  
26 *cerevisiae*. HDR: homology directed repair.

27

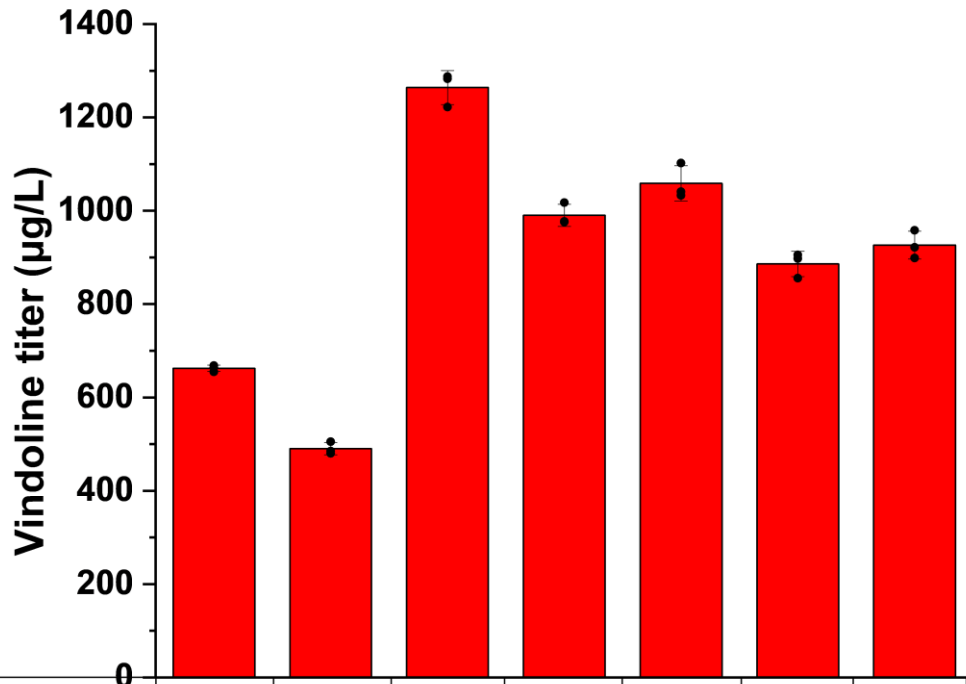

| Strain ID                           | VSY017 | VSY017-2 | VSY017-3 | VSY017-4 | VSY017-5 | VSY017-6 | VSY017-7 |
|-------------------------------------|--------|----------|----------|----------|----------|----------|----------|
| <i>T16H2-16OMT</i>                  | 4      | 4        | 4        | 4        | 4        | 4        | 4        |
| <i>T3O-T3R-NMT-D4H-DAT</i>          | 2      | 2        | 2        | 2        | 2        | 2        | 2        |
| <i>AtCPR1-CrCYB5</i>                | +      | 2        | +        | +        | +        | +        | +        |
| $\Delta$ <i>NCPI::AtCPR1-CrCYB5</i> |        |          | +        |          |          |          |          |
| $\Delta$ <i>NCPI::GuCPR1-CrCYB5</i> |        |          |          | +        |          |          |          |
| $\Delta$ <i>NCPI::GICPR-CrCYB5</i>  |        |          |          |          | +        |          |          |
| $\Delta$ <i>NCPI::MTR2-CrCYB5</i>   |        |          |          |          |          | +        |          |
| $\Delta$ <i>NCPI::CrCPR-CrCYB5</i>  |        |          |          |          |          |          | +        |

28

29 **Supplementary Fig. S2** Characterization of various CPRs for high vindoline production in strain

30 VSY017. Five CPRs with different origins (*CrCPR* from *C. roseus*, *AtCPR1* from *A. thaliana*,

31 *GuCPR1* from *G. uralensis*, *GICPR* from *G. lucidum*, and *MTR2* from *Medicago*) were integrated

32 into the *NCPI* locus of the engineered yeasts and their effects on vindoline production were

33 investigated. All strains were cultured in SC medium with 2% galactose in the presence of 50

34 mg/L tabersonine. Error bars represent SD of biological triplicates (n=3).

35

36

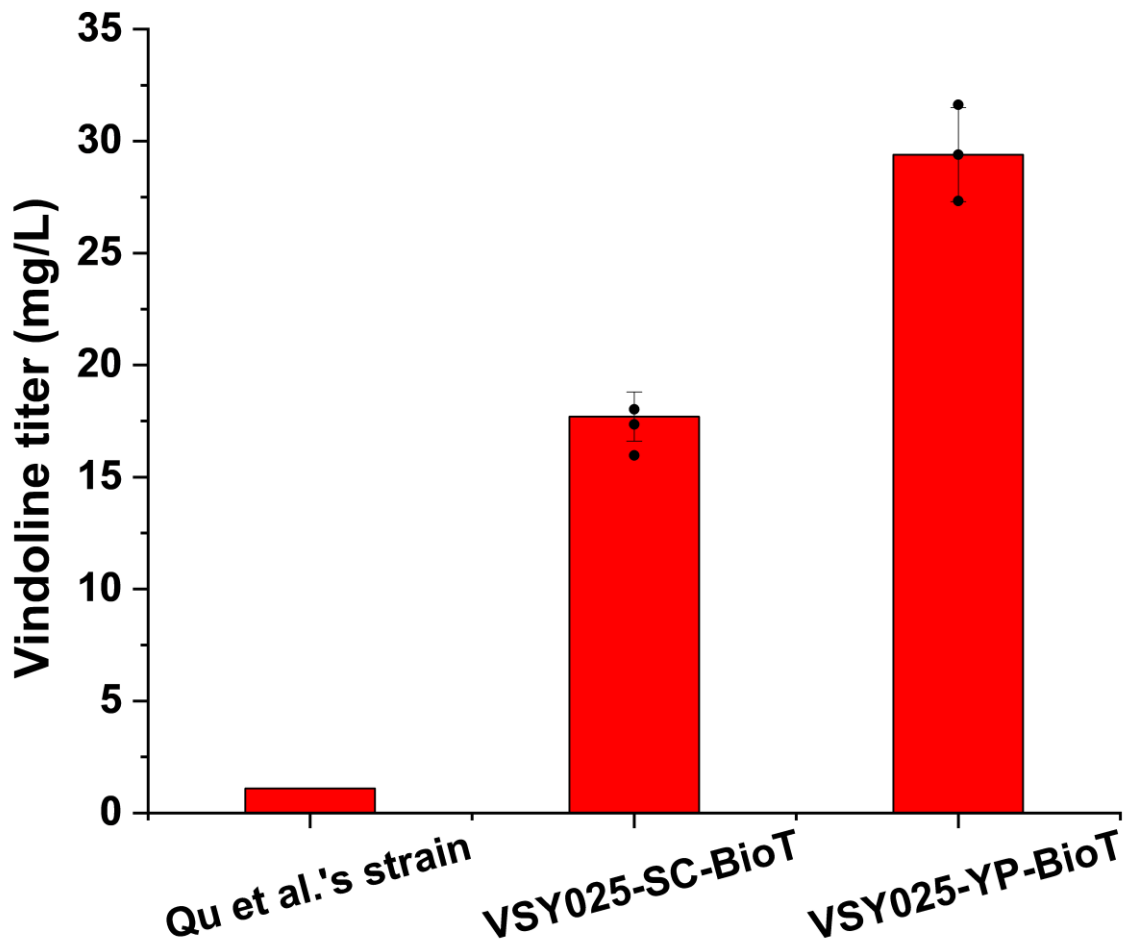

37

38 **Supplementary Fig. S3** The production of vindoline in strain VSY025 using high cell density  
39 yeast biotransformation (BioT). To demonstrate the advantages of the genome integrated strains  
40 in producing natural products, the production of vindoline was compared with the previously  
41 constructed strain, which included the same set of biosynthetic pathway genes on multi-copy  
42 plasmids (Qu et al.'s strain), under the same biotransformation conditions. The samples of the  
43 biotransformation assays were taken in 12 h. Error bars represent SD of biological triplicates  
44 (n=3).

45

46

47 **Supplementary Tables**48 **Supplementary Table S1** List of primers used in this study

| Primer name                      | Sequence (5'-3')                                      |
|----------------------------------|-------------------------------------------------------|
| <b>For plasmids construction</b> |                                                       |
| <i>T16H2</i> -BamHI-F            | aaccccggatccatggagttgtatttttcc                        |
| <i>T16H2</i> -XhoI-R             | gcttactcgagctaattttacctttgagagaa                      |
| <i>16OMT</i> -NotI-F             | atccttgaatccatcgatactagttcaaggataaacctcaatgaga        |
| <i>16OMT</i> -NotI-R             | attcaaccctcactaaaggcgccgcgatggatgtcaatctgaggagttc     |
| <i>T3R</i> -BamHI-F              | aaccccggatccatggctgcaaagtcagtgaag                     |
| <i>T3R</i> -XhoI-R               | gcttactcgagttagggtgattgaaagtgtt                       |
| <i>NMT</i> -NotI-F               | ccttgaatccatcgatactagttattgatttctcccgaactacag         |
| <i>NMT</i> -NotI-R               | cgaattcaaccctcactaaaggcgccgcgatggaagagaagcaggagaaggt  |
| <i>T3O</i> -BamHI-F              | aaccccggatccatggagtttcatgaatcttct                     |
| <i>T3O</i> -XhoI-R               | gcttactcgagcatgcataggacgtagcgatta                     |
| <i>D4H</i> -BamHI-F              | aaccccggatccatgaaggacttgaactttcatg                    |
| <i>D4H</i> -XhoI-R               | gcttactcgagattgttaacctgaaaggagat                      |
| <i>DAT</i> -NotI-F               | tccttgaatccatcgatactagttatgaaggacttgaactttcatg        |
| <i>DAT</i> -NotI-R               | attcgaattcaaccctcactaaaggcgccgcgattgtttaacctgaaaggaga |
| <i>CrCPR</i> -BamHI-F            | taacgtcaaggagaaaaaaccccgatccatggattctgactcggagaaag    |
| <i>CrCPR</i> -XhoI-R             | tagctagccgcggtaccaagcttactcgagtcaccagacatctcggagata   |
| <i>CrCYB5</i> -NotI-F            | ttgtaatccatcgatactagtttacttctccttagtatagtg            |
| <i>CrCYB5</i> -NotI-R            | cgaattcaaccctcactaaaggatggcgtcggatcagaaaatt           |
| <i>AtCPR1</i> -BamHI-F           | taacgtcaaggagaaaaaaccccgatccatgacttctgctttgtatgct     |
| <i>AtCPR1</i> -XhoI-R            | agctagccgcggtaccaagcttactcgagtcaccagacatctcggagta     |
| <i>GuCPR1</i> -BamHI-F           | taacgtcaaggagaaaaaaccccgatccatgacttcaattccgatttg      |
| <i>GuCPR1</i> -XhoI-R            | gctagccgcggtaccaagcttactcgagtcaccagacatccctgaggtaa    |
| <i>GICPR</i> -BamHI-F            | taacgtcaaggagaaaaaaccccgatccatggcgtccaccgacaccgtc     |
| <i>GICPR</i> -XhoI-R             | agctagccgcggtaccaagcttactcgagtcagctccaacatccgtaaa     |
| <i>MTR2</i> -BamHI-F             | taacgtcaaggagaaaaaaccccgatccatgcaagattcaagctcaatg     |
| <i>MTR2</i> -XhoI-R              | agctagccgcggtaccaagcttactcgagttaccatacatcacgcaaata    |
| <i>SAM2</i> -BamHI-F             | aacgtcaaggagaaaaaaccccgatccatgtccaagagcaaaactttct     |
| <i>SAM2</i> -XhoI-R              | agctagccgcggtaccaagcttactcgagttaaaattcaattttgtgt      |
| <i>INO2</i> -NotI-F              | catccttgaatccatcgatactagttcaggaatcatccagtatgtgct      |
| <i>INO2</i> -NotI-R              | tccaattcaaccctcactaaaggcgccgcgatgcaacaagcaactgggaacg  |
| <i>ZWF1</i> -BamHI-F             | aaccccggatccatgagtgaaagccccgtcaaa                     |
| <i>ZWF1</i> -XhoI-R              | gcttactcgagctaattatccttcgtatctt                       |

---

|                                                    |                                                               |
|----------------------------------------------------|---------------------------------------------------------------|
| <i>GAPN-NotI-F</i>                                 | gctcagatcagatctgtttactagtgctactttatgtcaaaagcaa                |
| <i>GAPN-NotI-R</i>                                 | tctaactaagtttaattacaagcggccgcatgacaaaacaatacaaaaaact          |
| <b>For genome integration</b>                      |                                                               |
| INT1- <i>CrCPR-CrCYB5-F</i>                        | gaaagaaaaactaacacattaatgtagttttaaattcagagcgacctcatgctatac     |
| INT1- <i>CrCPR-CrCYB5-R</i>                        | taattttattctagcatatattaaagttgtttgcgaaactcgagcgccaaaacc        |
| INT2- <i>T16H2-16OMT-F</i>                         | agcaataaacgtgaaatctgtttgtatataattgcaggagcgacctcatgctatac      |
| INT2- <i>T16H2-16OMT-R</i>                         | ggtttgggacgctcgaagcgataattgagcaatgatagatgaaatgccagattac       |
| INT3- <i>D4H-DAT-F</i>                             | gggctcaagaagacgttgataataagaacacggaaaatgggagcgacctcatgctatac   |
| INT3- <i>D4H-DAT-R</i>                             | tggttgattgtaattgtactattactgttcttctctcgcagcgccaaaacc           |
| INT4- <i>T3R-NMT -F</i>                            | tttaggatattgacccaagcgtgcgtctgattctacgttcaggctgcgcaactgtt      |
| INT4- <i>T3R-NMT -R</i>                            | gtttaataatgatctgtattgctggctcaatccacgtaagagtgcgctgataccgctcg   |
| INT5- <i>T3O -R</i>                                | accggtaccggagagaccgctataaccggttgaattagagcgacctcatgctatac      |
| INT5- <i>T3O -R</i>                                | ttcgaatgatgaactgcttgcctgcaacttctgagttgcttcgagcgcccaaaaacc     |
| INT6(VSY008,009)- <i>T16H2-16OMT-F</i>             | tattctactaaaaacacatcagtagtcacagaagtcacagttcaggctgcgcaactgtt   |
| INT6(VSY008,009)- <i>T16H2-16OMT-R</i>             | atttttcattaatacacctgtgttagttatgattgccagagtgagctgataccgctcg    |
| INT7(VSY009,014-016)- <i>T3R-NMT-F</i>             | gagagaaaataaacttggtggggttaattattgatgggttcaggctgcgcaactgtt     |
| INT7(VSY009,014-016)- <i>T3R-NMT-R</i>             | tattgataaaggttttagaataattattatcgatacctagtgagctgataccgctcg     |
| INT8(VSY009,014-016)- <i>T3O -F</i>                | acactcgcgagaacaaaacaaggatcccctaaaccagtttcaggctgcgcaactgtt     |
| INT8(VSY009,014-016)- <i>T3O-R</i>                 | ccgccccctttcccagatcgtgagataggtgcctcacagtgagctgataccgctcg      |
| INT9(VSY009,014-016)- <i>D4H-DAT-F</i>             | aggcaatgagcgaaagcgactgaagccgagagatgtgcccttcaggctgcgcaactgtt   |
| INT9(VSY009,014-016)- <i>D4H-DAT-R</i>             | gactagtatcatccgtcaagaagaacaagaacaagaacaagaagtgcgctgataccgctcg |
| INT10(VSY014)- <i>T16H2-16OMT-F</i>                | gttttctatttcttttttaaaaaacttcttaatttcaggctgcgcaactgtt          |
| INT10(VSY014)- <i>T16H2-16OMT-R</i>                | ttgagaaaaaagtgtatatacattactttacaccaagtgcgctgataccgctcg        |
| INT11(VSY015)- <i>T16H2-16OMT-F</i>                | tatgtatttgcagcttctacttctgcaatgtgatgccgttcaggctgcgcaactgtt     |
| INT11(VSY015)- <i>T16H2-16OMT-R</i>                | cagtaactaatgcaaacaaatcaggcatctgtgtatattagtgagctgataccgctcg    |
| INT12(VSY016)- <i>T16H2-16OMT-F</i>                | ttacgtgtcattfattatgggttcagaataatgtgtaattcaggctgcgcaactgtt     |
| INT12(VSY016)- <i>T16H2-16OMT-R</i>                | acaatttgggtgctgaaattgatgccggaattgcccagtgagctgataccgctcg       |
| $\Delta$ <i>CrCPR</i> (VSY017-020)- <i>CPRs-F</i>  | gaaagaaaaactaacacattaatgtagttttaaattcagagcgacctcatgctatac     |
| $\Delta$ <i>CrCPR</i> (VSY017-020)- <i>CPRs-R</i>  | taattttattctagcatatattaaagttgtttgcgaaactcgagcgccaaaacc        |
| INT13(VSY021)- <i>CrCPR-CrCYB5 -F</i>              | ctatgtgacgctgtgtattctttgttagttatgctccattcaggctgcgcaactgtt     |
| INT13(VSY021)- <i>CrCPR-R</i>                      | gtacgctatacattacgtgctgagctcctaggaagctagtgagctgataccgctcg      |
| INT13(VSY022)- <i>AtCPR1-CrCYB5-F</i>              | ctatgtgacgctgtgtattctttgttagttatgctccattcaggctgcgcaactgtt     |
| INT13(VSY022)- <i>AtCPR1-CrCYB5-R</i>              | gtacgctatacattacgtgctgagctcctaggaagctagtgagctgataccgctcg      |
| $\Delta$ <i>OPII</i> (VSY023):: <i>ZWF1-GAPN-F</i> | attcaaaggtaaagagggtccgataataatgtagttcaattcaggctgcgcaactgtt    |
| $\Delta$ <i>OPII</i> (VSY023):: <i>ZWF1-GAPN-R</i> | agcgatctgcacttagccaagaagcatatcaggccagaagtgagctgataccgctcg     |
| INT14(VSY024)- <i>SAM2-INO2-F</i>                  | ctaccaaggtgttgagggaacactggggcaataggctgtgagcgacctcatgctatac    |
| INT14(VSY024)- <i>SAM2-INO2-R</i>                  | ctgttactcttgcagacatcagacatactattgtaattcctcgcagctcccaaaaacc    |
| $\Delta$ <i>NCPI</i> (VSY017-1)- <i>CPRs-F</i>     | gatctactgtcgcacatatcatccgtttggaatagacaactatctcagegatctgtct    |

---

---

|                                            |                                                                   |
|--------------------------------------------|-------------------------------------------------------------------|
| <i>ΔNCPI(VSY017-1)-CPRs-R</i>              | <u>ttggtatctac</u> ctgaagctcttgagcatcttgattagctcttcaacattccggtcgc |
| INT15(VSY017-2)- <i>AtCPR1-CYB5-F</i>      | ttacgtgcattattatgggtcagaaattatgtttaattcaggctgcgcaactgtt           |
| INT15(VSY017-2)- <i>AtCPR1-CYB5-R</i>      | acaatttgggtggcgtgaaattgatccggaattgcccagtgagctgataccgctcg          |
| <i>ΔNCPI(VSY017-1, 3-7; VSY025)-CPRs-F</i> | tgtagcttaagttgcgttctctgtagtggtcaccgctacggatgtgctgcaaggcgatt       |
| <i>ΔNCPI(VSY017-1, 3-7; VSY025)-CPRs-R</i> | ctggatcttcgagcgtcccgtggtgaacaaccgcgccgaaggctgatcagtgggctg         |

---

49 \* Restriction sites are underlined.

50 **Supplementary Table S2** List of sgRNAs used in this study

51

| SgRNAs                   | Sequences (5'-3')    | Chromosomal loci        |
|--------------------------|----------------------|-------------------------|
| Sg-INT1                  | AATCCGAACAACAGAGCATA | ChrXVI: 776,883-776,902 |
| Sg-INT2                  | GCGCCACAGTTTCAAGGGTC | ChrXIV: 28,250-28,269   |
| Sg-INT3                  | GGTTTTCATACTGGGGCCGC | ChrVI: 237,073-237,092  |
| Sg-INT4                  | CGATACAGTGGCTGCTCATG | ChrXI: 93,963-93,982    |
| Sg-INT5                  | TTGTCACAGTGTACATCAG  | ChrXII: 839,660-839,679 |
| Sg-INT6                  | AAGTCACGTATATAAGCTAG | ChrVI: 210,532-210,551  |
| Sg-INT7-                 | TATATTAATTTGCAACCGCA | ChrXII: 498,543-498,562 |
| Sg-INT8                  | ACCCGCATACGGTCTCCCG  | ChrXVI: 641,486-641,505 |
| Sg-INT9                  | TATATTAATTTGCAACCGCA | ChrXIV: 662,242-662,261 |
| Sg-INT10                 | ACACGTTTGTGGTTATAAGG | ChrIV: 561,137-561,156  |
| Sg-INT11                 | GTAAAACACCTATAGCACTG | ChrVII: 320,896-320,915 |
| Sg-INT12                 | GTTGAAATATAAGTAACCCT | ChrX: 415,611-415,630   |
| Sg- $\Delta$ CrCPR::CPRs | CCTGGAGGACGAATTCACAA | CrCPR:1,555-1,574       |
| Sg-INT13                 | TGGCATTGAGATTCCAACG  | ChrXV: 544,591-544,610  |
| Sg- $\Delta$ OPII        | TGTCGCGGGCGATTGCCAAG | ChrVIII: 67,100-67,119  |
| Sg-INT14                 | CGCCATTCAAGAGCAGCAAC | ChrX: 236,843-236,862   |
| Sg-INT15                 | GTTGAAATATAAGTAACCC  | ChrX: 415,611-415,630   |
| Sg- $\Delta$ NCP1        | CGGACAAGTCAAATTCAGAG | ChrVIII 190,543-192,618 |

52
