# Supplementary material for: Efficient production of vindoline from tabersonine by metabolically engineered Saccharomyces cerevisiae
Source: PubMed Central journal article supplement (PMC8446080; doi:10.1038/s42003-021-02617-w), 2021-09-16
Supplement: 42003_2021_2617_MOESM2_ESM.pdf [file 42003_2021_2617_MOESM2_ESM.pdf]

## **Description of Additional Supplementary Files**

**File name:** Supplementary Data 1.

**Description:** Source data underlying graphs and charts.

**File name:** Supplementary Data 2.

**Description:** DNA sequences of genes used in this study.
